# Supplementary material for: Crop rotation increases root biomass and promotes the correlation of soil dissolved carbon with the microbial community in the rhizosphere
Source: PubMed Central journal article supplement (PMC9763999; doi:10.3389/fbioe.2022.1081647), 2022-12-06
Supplement: Presentation1.pdf [file Presentation1.pdf]

Table S1 The effect of agricultural practices (AP) and plant growth stages (S) on soil carbon and microbial diversity index

| Factors     |      | $\eta^2$ |         |         |         |         |         |
|-------------|------|----------|---------|---------|---------|---------|---------|
|             |      | TOC      | AOC     | DOC     | MBC     | B_Obs   | F_Obs   |
| Rhizosphere | AP   | 0.71 **  | 0.51 ** | 0.85 ** | 0.83 ** | 0.41 *  | 0.88 ** |
|             | S    | ns       | 0.45 ** | 0.98 ** | 0.87 ** | 0.91 ** | 0.87 ** |
|             | AP×S | ns       | ns      | 0.93 ** | ns      | 0.50 *  | 0.64 ** |
| Bulk        | AP   | 0.47 **  | 0.71 ** | ns      | 0.72 ** | ns      | 0.74 ** |
|             | S    | ns       | 0.49 ** | ns      | 0.70 ** | 0.73 ** | 0.41 *  |
|             | CP×S | ns       | 0.46 *  | 0.44 *  | 0.44 *  | ns      | 0.41 *  |

The significance level, ns: not significant; \*:  $p < 0.05$ ; \*\*:  $p < 0.01$ .  $\eta^2$  describes the percentage of variance explained in the dependent variable by a predictor variable. AP: agricultural practices (C, CS, R and RS); S: plant growth stages (V10, VT and R4). C: continuous maize cropping without straw retention; CS: continuous maize cropping with straw mulching; R: maize-peanut rotation without straw retention; RS: maize-peanut rotation with straw mulching; V10: the tenth leaf stage; VT: tassel stage; R4: dough stage; TOC: total organic carbon; AOC: active organic carbon; DOC: dissolved organic carbon; MBC: microbial biomass carbon; B\_Obs: observed bacterial species; F\_Obs: observed fungal species.

Table S2 The ecological guilds of the fungal genera predicted by FUNGUild

| Taxon                 | Trophic Mode                      | Guild                                                                    |
|-----------------------|-----------------------------------|--------------------------------------------------------------------------|
| <i>Cylindrocarpon</i> | Pathotroph                        | Plant Pathogen                                                           |
| <i>Gibberella</i>     | Pathotroph                        | Plant Pathogen                                                           |
| <i>Ilyonectria</i>    | Pathotroph                        | Plant Pathogen                                                           |
| <i>Leptosphaeria</i>  | Pathotroph                        | Plant Pathogen                                                           |
| <i>Mycosphaerella</i> | Pathotroph                        | Plant Pathogen                                                           |
| <i>Penicillium</i>    | Pathotroph                        | Animal Pathogen                                                          |
| <i>Didymella</i>      | Pathotroph-Saprotroph             | Animal Pathogen-Plant Pathogen-Undefined Saprotroph                      |
| <i>Exophiala</i>      | Pathotroph-Saprotroph             | Animal Pathogen-Undefined Saprotroph                                     |
| <i>Paraphoma</i>      | Pathotroph-Saprotroph             | Fungal Parasite-Plant Pathogen-Plant Saprotroph                          |
| <i>Setophoma</i>      | Pathotroph-Saprotroph             | Fungal Parasite-Plant Pathogen-Plant Saprotroph                          |
| <i>Torula</i>         | Pathotroph-Saprotroph             | Endophyte-Plant Pathogen-Wood Saprotroph                                 |
| <i>Acremonium</i>     | Pathotroph-Saprotroph-Symbiotroph | Animal Pathogen-Endophyte-Fungal Parasite-Plant Pathogen-Wood Saprotroph |
| <i>Alternaria</i>     | Pathotroph-Saprotroph-Symbiotroph | Animal Pathogen-Endophyte-Plant Pathogen-Wood Saprotroph                 |
| <i>Fusarium</i>       | Pathotroph-Saprotroph-            | Animal Pathogen-Endophyte-                                               |

|                         |                                       |                                                                      |
|-------------------------|---------------------------------------|----------------------------------------------------------------------|
|                         | Symbiotroph                           | Lichen Parasite-Plant Pathogen-<br>Soil Saprotroph-Wood Saprotroph   |
| <i>Plectosphaerella</i> | Pathotroph-Saprotroph-<br>Symbiotroph | Plant Pathogen                                                       |
| <i>Microdochium</i>     | Pathotroph-Symbiotroph                | Endophyte-Plant Pathogen                                             |
| <i>Botryotrichum</i>    | Saprotroph                            | Undefined Saprotroph                                                 |
| <i>Chaetomidium</i>     | Saprotroph                            | Dung Saprotroph-Undefined Saprotroph                                 |
| <i>Myrmecridium</i>     | Saprotroph                            | Undefined Saprotroph                                                 |
| <i>Neosetophoma</i>     | Saprotroph                            | Undefined Saprotroph                                                 |
| <i>Preussia</i>         | Saprotroph                            | Undefined Saprotroph                                                 |
| <i>Pseudaleuria</i>     | Saprotroph                            | Undefined Saprotroph                                                 |
| <i>Pseudogymnoascus</i> | Saprotroph                            | Plant Saprotroph-Wood Saprotroph                                     |
| <i>Schizothecium</i>    | Saprotroph                            | Undefined Saprotroph                                                 |
| <i>Tausonia</i>         | Saprotroph                            | Undefined Saprotroph                                                 |
| <i>Thelebolus</i>       | Saprotroph                            | Dung Saprotroph                                                      |
| <i>Helotiaceae</i>      | Saprotroph-Symbiotroph                | Ectomycorrhizal-Fungal Parasite-<br>Plant Pathogen-Wood Saprotroph   |
| <i>Mortierella</i>      | Saprotroph-Symbiotroph                | Endophyte-Litter Saprotroph-<br>Soil Saprotroph-Undefined Saprotroph |
| <i>Monodictys</i>       | -                                     | -                                                                    |
| <i>Solicoccozyma</i>    | -                                     | -                                                                    |
| <i>Dokmaia</i>          | -                                     | -                                                                    |

---

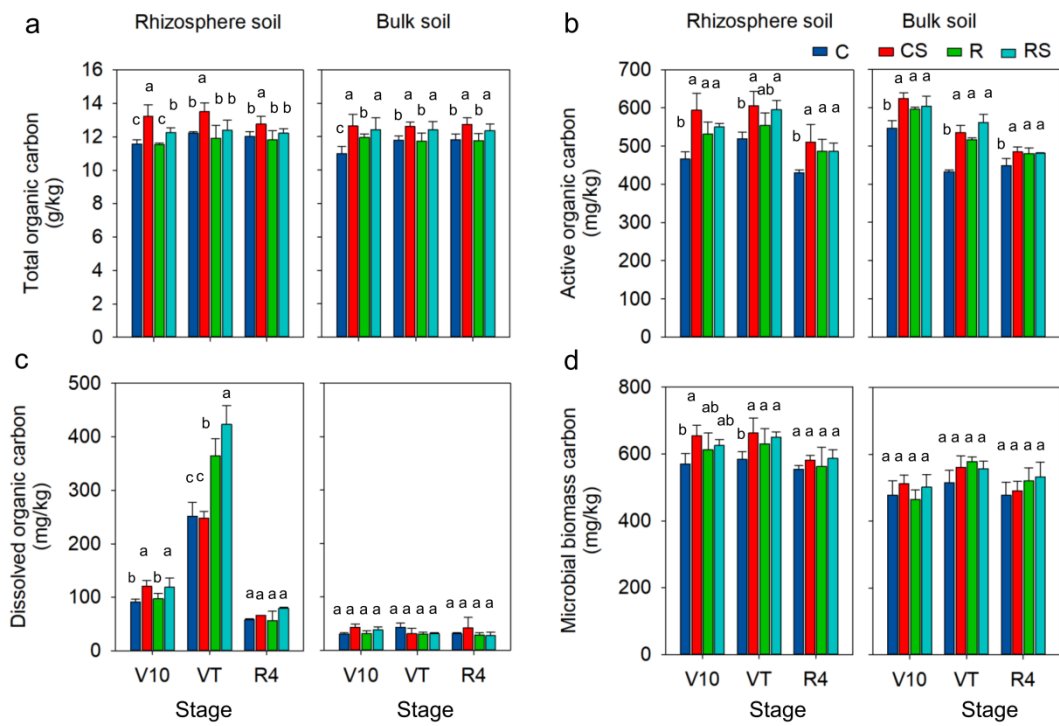

Fig.S1 Total organic carbon (a), active organic carbon (b), dissolved organic carbon (c) and microbial biomass carbon (d) in the four agricultural practices at three growth stages. Error bars indicate the standard deviation of three replicates. Different letters indicate significant differences ( $P < 0.05$ ) between treatments at each growth stage.

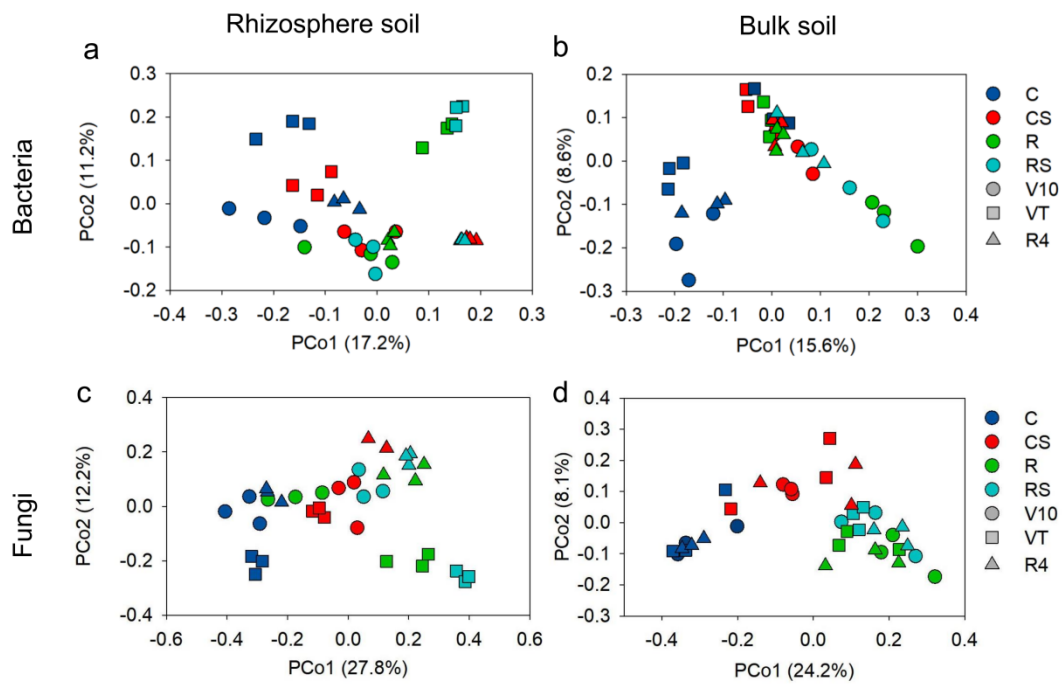

Fig.S2 PCoA of the bacteria community in rhizosphere soil (a) and bulk soil (b); PCoA of the fungi community in rhizosphere soil (c) and bulk soil (d). C: continuous maize cropping without straw retention; CS: continuous maize cropping with straw mulching; R: maize-peanut rotation without straw retention; RS: maize-peanut rotation with straw mulching; V10: the tenth leaf stage; VT: tassel stage; R4: dough stage.
